# Supplementary material for: Differences in the Phenolic Profile by UPLC Coupled to High Resolution Mass Spectrometry and Antioxidant Capacity of Two Diospyros kaki Varieties
Source: PubMed Central journal article supplement (PMC7823481; doi:10.3390/antiox10010031), 2020-12-30
Supplement: antioxidants-10-00031-s001.pdf [file antioxidants-10-00031-s001.pdf]

**Supplementary Materials:**

**Table S1.** Quality parameters for the chromatographic determination of phenolic compounds in persimmon.

| Phenolic compounds                            | Linear range (ppm) | R <sub>t</sub> ± (σ <sub>n-1</sub> ) | Linear equation        | R <sup>2</sup> | LOD (mg/L) | LOQ (mg/L) |
|-----------------------------------------------|--------------------|--------------------------------------|------------------------|----------------|------------|------------|
| <i>Phenolic acids / Hydroxybenzoic Acids</i>  |                    |                                      |                        |                |            |            |
| Gallic Acid                                   | 0.10 - 40          | 1.25 ± 0.018                         | y = 62.009x + 17.032   | 0.998          | 0.995      | 3.316      |
| Vanillic acid                                 | 0.10 - 40          | 2.88 ± 0.006                         | y = 40.782x + 19.537   | 0.969          | 1.116      | 3.719      |
| <i>p</i> -Hydroxybenzoic acid                 | 0.10 - 40          | 2.55 ± 0.006                         | y = 25.438x + 14.870   | 0.990          | 2.250      | 7.499      |
| Protocatechuic acid                           | 0.10 - 40          | 1.89 ± 0.014                         | y = 62.694x + 5.146    | 0.995          | 0.443      | 1.476      |
| Syringic acid                                 | 0.10 - 40          | 3.01 ± 0.005                         | y = 72.910x + 46.419   | 0.985          | 1.521      | 5.071      |
| Ellagic acid                                  | 0.10 - 40          | 3.69 ± 0.027                         | y = 6.943x + 19.840    | 0.986          | 5.937      | 19.789     |
| 3,4-Dimethoxybenzoic acid                     | 0.10 - 40          | 5.50 ± 0.019                         | y = 33.516x + 90.999   | 0.987          | 6.377      | 21.258     |
| <i>Phenolic acids / Hydroxycinnamic Acids</i> |                    |                                      |                        |                |            |            |
| Caffeic acid                                  | 0.10 - 40          | 2.83 ± 0.004                         | y = 157.049x + 83.152  | 0.990          | 2.300      | 7.666      |
| Dimethyl caffeic acid                         | 0.10 - 40          | 5.02 ± 0.001                         | y = 73.505x + 23.303   | 0.991          | 1.148      | 3.828      |
| Ferulic acid                                  | 0.10 - 40          | 3.90 ± 0.003                         | y = 95.024x + 22.681   | 0.996          | 0.384      | 1.282      |
| <i>p</i> -cumaric acid                        | 0.10 - 40          | 3.54 ± 0.040                         | y = 60.241x + 38.482   | 0.992          | 2.064      | 6.879      |
| 4-Methoxycinnamic acid                        | 0.10 - 40          | 5.89 ± 0.066                         | y = 24.461x + 1.204    | 0.999          | 0.099      | 0.329      |
| Sinapic acid                                  | 0.10 - 40          | 3.91 ± 0.015                         | y = 213.624x + 8.133   | 0.997          | 0.082      | 0.273      |
| Chlorogenic acid                              | 0.10 - 40          | 2.41 ± 0.001                         | y = 165.169x - 6.908   | 0.997          | 0.610      | 2.033      |
| <i>Tyrosols</i>                               |                    |                                      |                        |                |            |            |
| Tyrosol                                       | 0.10 - 40          | 5.47 ± 0.041                         | y = 6.851x + 5.560     | 0.962          | 2.385      | 7.951      |
| <i>Flavonoids / Flavonols</i>                 |                    |                                      |                        |                |            |            |
| Quercetin                                     | 0.10 - 40          | 5.52 ± 0.003                         | y = 509.550x + 159.841 | 0.990          | 1.220      | 4.066      |
| <i>Others</i>                                 |                    |                                      |                        |                |            |            |
| Pyrogalllic acid                              | 0.10 - 40          | 1.27 ± 0.097                         | y = 41.508x + 23.640   | 0.993          | 1.937      | 6.455      |

R: retention time; σ<sub>n</sub>: standard deviation; R: correlation coefficient; LOD: Limit of detection; LOQ: Limit of quantification.

**Table S2.** Precision parameters of the method used to determine individual phenolic compounds in persimmon.

| Phenolic compounds            | n  | Mean area ± (σ <sub>n-1</sub> ) | S <sup>2</sup> | CV (%) |
|-------------------------------|----|---------------------------------|----------------|--------|
| Gallic Acid                   | 10 | 516.4 ± 67.3                    | 0.46           | 1.30   |
| <i>p</i> -Hydroxybenzoic acid | 10 | 171.9 ± 23.8                    | 2.75           | 1.38   |
| Caffeic acid                  | 10 | 108.8 ± 7.21                    | 0.51           | 0.66   |
| Ferulic acid                  | 10 | 65.5 ± 6.41                     | 5.85           | 0.97   |
| <i>p</i> -coumaric acid       | 10 | 89.8 ± 2.37                     | 0.73           | 0.26   |

σ<sub>n</sub>: Standard deviation; S<sup>2</sup>: Variance; CV: Coefficient of variation.

**Table S3.** Statistical analysis relating to antioxidant activity as measured by DPPH, ABTS and FRAP assays, and total phenolic compound content as measured by the FOLIN method.

| Antioxidant activity method | Equation               | Correlation coefficient (r) (n=10) | Concentration range Trolox |
|-----------------------------|------------------------|------------------------------------|----------------------------|
| TPC (700 nm)                | y = 0.0915 x + 0.092 a | 0.991                              | 0.5-7.5 ppm                |

|                 |                         |       |                        |
|-----------------|-------------------------|-------|------------------------|
| ABTS•+ (734 nm) | $y = 0.176 x + 6.671 b$ | 0.995 | 10 – 500 $\mu\text{M}$ |
| DPPH (515 nm)   | $y = 130.9 x + 4.889 b$ | 0.999 | 0.05 – 0.5 mM          |
| FRAP (593 nm)   | $y = 0.041 x + 0.033 b$ | 0.994 | 10 – 300 $\mu\text{M}$ |

a  $y = bx + a$ ,  $y$  = absorbance (700 nm),  $x$  = Gallic acid concentration. b  $y = bx + a$ ,  $y$  = percentage inhibition,  $x$  = Trolox concentration.

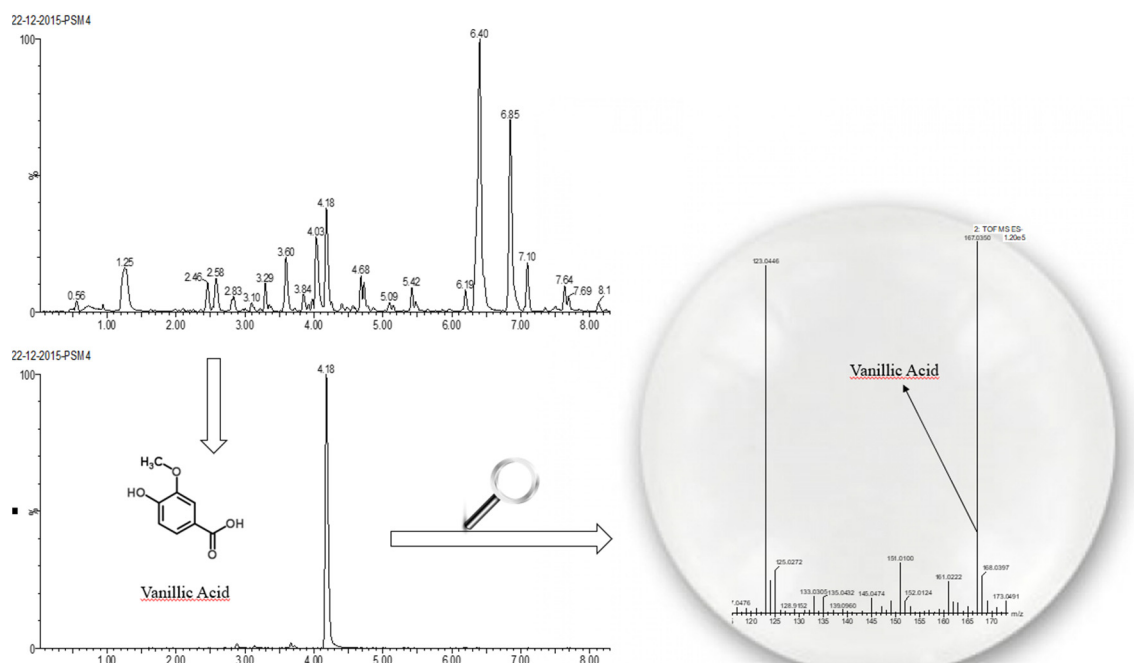

**Figure S1.** Chromatogram of a *Rojo Brillante* sample, chromatogram extracted from vanillic acid and spectrum of vanillic acid.

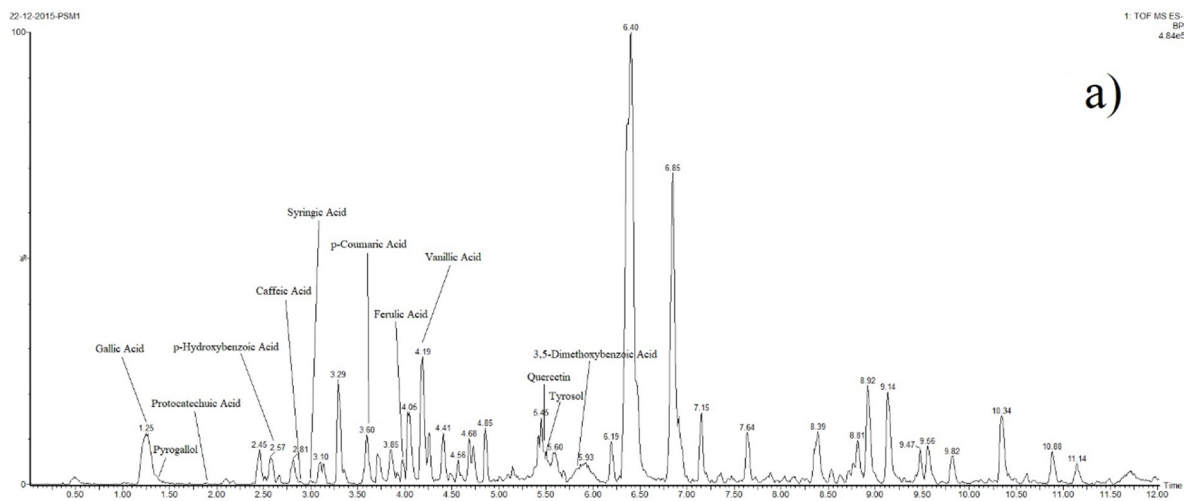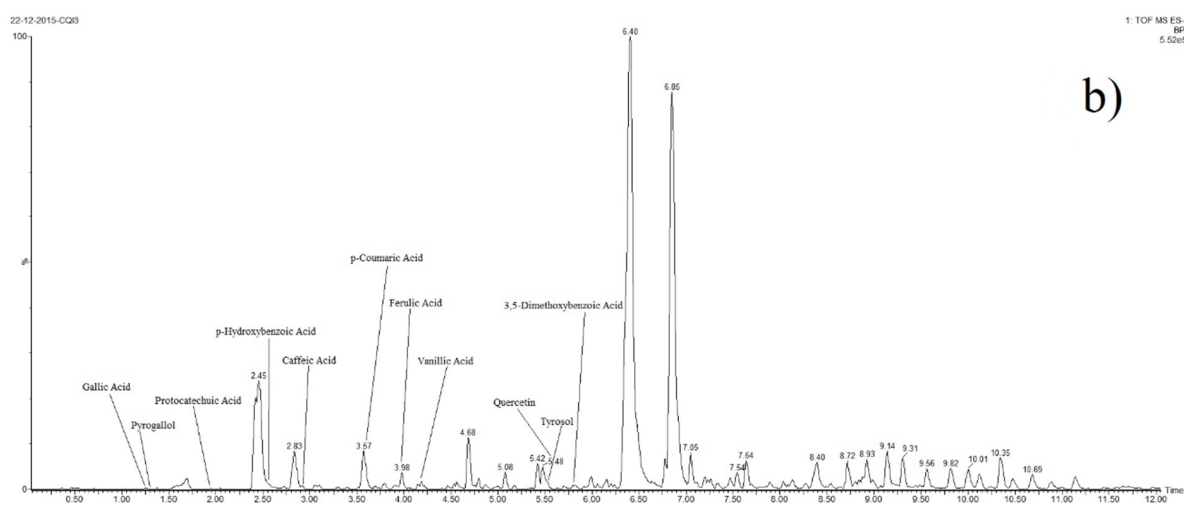

Figure S2. UPLC-QTOF-MS chromatogram *Rojo Brillante* sample (a) *Triumph* sample (b).
